# Supplementary material
Source: PubMed Central journal article supplement (PMC1965507)
Supplement: pnas_0703824104_7.pdf [file pnas_0703824104_7.pdf]

**Table 1. Induction of cytokines and chemokines from human NKT cells by glycolipids *in vitro***

| Human         | basal | C1         | C2         | C3         | C4   | C5         | C6   | C7         | C8         | C9         | C10        | C11        | C12        | C13        | C14  | C15        | C16        | C17  |
|---------------|-------|------------|------------|------------|------|------------|------|------------|------------|------------|------------|------------|------------|------------|------|------------|------------|------|
| TH1 bias      | pg/ml | fold       | fold       | fold       | fold | fold       | fold | fold       | fold       | fold       | fold       | fold       | fold       | fold       | fold | fold       | fold       | fold |
| IFN- $\gamma$ | 4613  | 3.4        | 2.7        | 2.4        | 1.3  | 2.2        | 2.1  | 2.8        | 1.9        | 3.3        | <b>4.6</b> | <b>6.4</b> | 3.9        | <b>6.6</b> | 3.4  | <b>4.2</b> | <b>6.2</b> | 1.9  |
| IL-2          | 20.5  | 2.3        | 1.8        | 1.3        | 1.2  | 1.6        | 1.4  | 1.5        | 1.3        | 2.4        | <b>5.9</b> | <b>6.1</b> | 1.9        | <b>2.8</b> | 2.3  | <b>3.4</b> | <b>3.9</b> | 1.5  |
| IL-12 p70     | 22    | 1.8        | 1.6        | 1.7        | 1    | 1.6        | 1.2  | 1.7        | 1.8        | <b>2.8</b> | <b>3.3</b> | <b>4.7</b> | 2.1        | <b>3.2</b> | 2.7  | 2.3        | <b>3</b>   | 1    |
| IL-12 p40     | 396   | 1.4        | 1.7        | <b>1.9</b> | 1.7  | 1.8        | 1.4  | 1.9        | 1.8        | <b>2</b>   | <b>2.4</b> | <b>2.3</b> | 1.8        | 1.8        | 1.8  | 1.4        | <b>2.1</b> | 1.4  |
| RANTES        | 6413  | 1.6        | 2          | <b>2.4</b> | 1.5  | 1.5        | 1.5  | 1.7        | 1.3        | 1.6        | <b>1.8</b> | 1.7        | <b>2</b>   | <b>2.5</b> | 1.6  | <b>2.1</b> | 1.6        | 1.8  |
| MIP- $\alpha$ | 13365 | 2.9        | <b>3.5</b> | <b>3.5</b> | 1.5  | 3.2        | 3.2  | 3.4        | 2.8        | 3.4        | 3          | 3.3        | <b>3.5</b> | <b>3.6</b> | 3.3  | 3.4        | <b>3.4</b> | 2.7  |
| MCP-1         | 10768 | 0.9        | 1.4        | <b>1.7</b> | 1.4  | <b>1.5</b> | 1    | 1.4        | 0.9        | 1.4        | 1.3        | 1          | <b>1.8</b> | <b>2</b>   | 1.2  | <b>1.5</b> | 0.6        | 1.3  |
| IL-8          | 4325  | 1.7        | <b>2.2</b> | <b>2.3</b> | 1.9  | 1.9        | 1.6  | 2.4        | 1.9        | <b>2.2</b> | <b>2.2</b> | 1.8        | <b>2.3</b> | <b>3</b>   | 1.4  | 2.2        | 1.8        | 1.6  |
| TNF- $\alpha$ | 193.5 | <b>7.7</b> | 3          | 5.5        | 2.5  | 3.7        | 3.3  | 3.3        | 5.5        | <b>8.4</b> | <b>8.7</b> | <b>8.1</b> | 3.4        | <b>7.6</b> | 1.7  | 5.6        | 7.4        | 2.2  |
| IL-3          | 57    | 1.9        | 1.7        | 1.7        | 1.1  | <b>2.3</b> | 1.8  | 1.6        | 1.9        | 3.3        | <b>4.1</b> | <b>4.2</b> | <b>2.6</b> | 1.7        | 1.3  | 1.8        | <b>2.5</b> | 1.4  |
| GM-CSF        | 511   | 3.5        | 3          | 2.9        | 1.6  | 4.1        | 2.8  | 3.5        | 3.8        | <b>6.6</b> | <b>5.6</b> | <b>6.7</b> | <b>5.8</b> | 4.3        | 2    | 3.4        | <b>5.4</b> | 4.7  |
| IL-15         | 150   | <b>2.6</b> | <b>2.4</b> | 2          | 1.8  | 2.2        | 2.2  | 2.1        | 2.2        | 2.3        | <b>2.6</b> | <b>2.8</b> | 2.3        | 2.3        | 1.7  | 2.3        | <b>2.7</b> | 2.1  |
| TH2 bias      |       |            |            |            |      |            |      |            |            |            |            |            |            |            |      |            |            |      |
| IL-4          | 825   | <b>3.9</b> | <b>2.8</b> | <b>2.9</b> | 2.1  | <b>2.9</b> | 1.9  | 2.4        | 2.2        | 2.7        | <b>3</b>   | 2.6        | 2.8        | 2.7        | 1.5  | 3.2        | 1.9        | 2.7  |
| IL-6          | 630   | 1.8        | 1.9        | <b>2.3</b> | 1.5  | 1.9        | 1.6  | <b>2.3</b> | 2.1        | <b>2.7</b> | <b>2.7</b> | 2.2        | 1.9        | <b>2.8</b> | 1    | 1.6        | 2.1        | 1.8  |
| IL-10         | 1530  | 1.2        | 1.9        | 1.7        | 0.6  | 1.8        | 1.3  | 1.7        | <b>2.2</b> | <b>2.5</b> | <b>2.4</b> | <b>2.3</b> | 2          | 1.2        | 0.7  | 1.4        | 1.8        | 1.5  |
| IL-13         | 803   | 1.8        | <b>1.9</b> | <b>2</b>   | 1.6  | <b>2.4</b> | 1.6  | <b>2.1</b> | 1.4        | 1.6        | <b>2.6</b> | 1.7        | 1.8        | <b>2.3</b> | 1.1  | 1.6        | 1.6        | 1.8  |

Folds of increase over basal cytokine concentration in the supernatants of human NKT cells treated with glycolipids, as described in SI Fig. 6. Data shown are the averages of triplicate assays at the concentration of 10 ug/ml of tested compounds after 18 hr of incubation. The top five values for each cytokine are shown in bold. There is no significant induction of IL-1 $\alpha$ , IL-1 $\beta$ , IL-5, IL-7, IP-10, or Eotaxin from hNKT cells by glycolipids.
