# Supplementary material
Source: PubMed Central journal article supplement (PMC1965507)
Supplement: pnas_0703824104_8.pdf [file pnas_0703824104_8.pdf]

**Table 2. Induction of cytokines and chemokines in mouse serum after injection of glycolipids**

| Mouse           | basal | C1          | C2         | C3         | C9           | C11         | C13         | C14         | C16          |
|-----------------|-------|-------------|------------|------------|--------------|-------------|-------------|-------------|--------------|
| TH1 bias        | pg/ml | fold        | fold       | fold       | fold         | fold        | fold        | fold        | fold         |
| IFN- $\gamma$ * | 20.4  | <b>300</b>  | 43.8       | 3.1        | <b>160.8</b> | 48.3        | 122.5       | 27.5        | <b>166.1</b> |
| IL-1 $\beta$ *  | 85.3  | <b>7.8</b>  | 2.4        | 2          | 3.2          | <b>4.7</b>  | 3.4         | <b>4.8</b>  | 3.4          |
| IL-2            | 14.8  | <b>58.9</b> | 14         | 17.2       | 22           | <b>70.3</b> | <b>75.3</b> | 21.5        | 50.5         |
| IL12 p70*       | 109   | <b>3.2</b>  | <b>3.5</b> | 1.2        | 1.4          | 2.6         | <b>6.6</b>  | 1.4         | 1.6          |
| IL12 p40*       | 69.4  | 2.8         | 0.9        | 1.9        | 2.1          | <b>3.8</b>  | <b>3.5</b>  | <b>4.4</b>  | 2.4          |
| RANTES          | 278   | <b>2.6</b>  | 0.9        | 0.9        | 1.6          | <b>2.3</b>  | 2.1         | <b>2.8</b>  | 2.2          |
| MIP- $\beta$    | 291   | 3.6         | 1.5        | 1.4        | 2.5          | <b>3.8</b>  | <b>5.3</b>  | 1.8         | <b>5.1</b>   |
| MCP-1           | 122   | 18.7        | 2.6        | 5.6        | 14.8         | <b>19.4</b> | <b>32.9</b> | 8           | <b>23.6</b>  |
| KC              | 180   | <b>30.5</b> | 3.9        | 7.6        | <b>16.4</b>  | 11          | <b>19.2</b> | 16.1        | 6.9          |
| TNF $\alpha$ *  | 8     | <b>51</b>   | 2          | 6          | 36.3         | 22.4        | <b>38.8</b> | 8.7         | <b>45.6</b>  |
| IL-3            | 8.35  | <b>3</b>    | 1.5        | <b>2.8</b> | 1.8          | 2.4         | 2.3         | <b>10.4</b> | 1.9          |
| GM-CSF          | 82.8  | <b>13.1</b> | 1.6        | 4.9        | 7.3          | 2.9         | <b>7.9</b>  | <b>37.6</b> | 2.7          |
| TH2 bias        |       |             |            |            |              |             |             |             |              |
| IL-4            | 7.46  | <b>240</b>  | 26.2       | 26.8       | 42.9         | <b>53.1</b> | <b>115</b>  | 21.2        | 49.6         |
| IL-6            | 33.1  | <b>5.5</b>  | 1.5        | 1.7        | 2.2          | 2.8         | <b>6.3</b>  | 4.9         | <b>5.8</b>   |
| IL-10*          | 81.2  | <b>3.6</b>  | <b>5.4</b> | 1.1        | <b>2.4</b>   | 1.3         | 2.2         | 1.5         | 1.3          |
| IL-13           | 75.8  | <b>15.1</b> | 0.9        | 2.3        | 2.4          | <b>10.9</b> | <b>12.6</b> | 1.7         | 7.7          |

BALB/c mice ( $n = 4$ ) were injected i.v. with indicated glycolipids (2  $\mu$ g per mouse) or vehicle. Serum samples collected at 0, 2, 18, 36, 48, and 72 h were analyzed for 22 cytokines/chemokines, using the Luminex 100 system. Folds of increase over basal serum concentrations are obtained from the peak concentrations in triplicate assays. All cytokines/chemokines peaked at 2 hr after injection, except that those marked with \* peaked at 18 h. The top three values for each cytokine are shown in bold. There is no significant induction of IL-1 $\alpha$ , IL-5, IL-9, IL-17, or VEGF in mouse sera by glycolipids.
