# Supplementary material
Source: PubMed Central journal article supplement (PMC1965507)

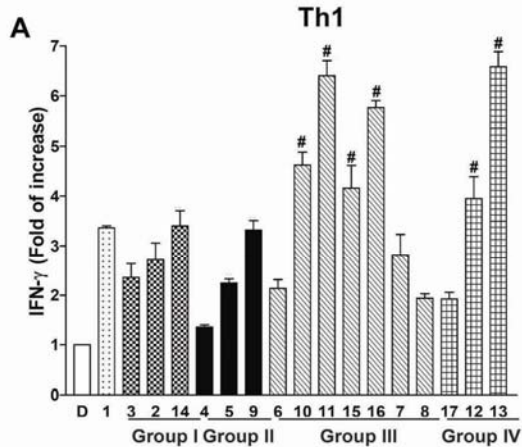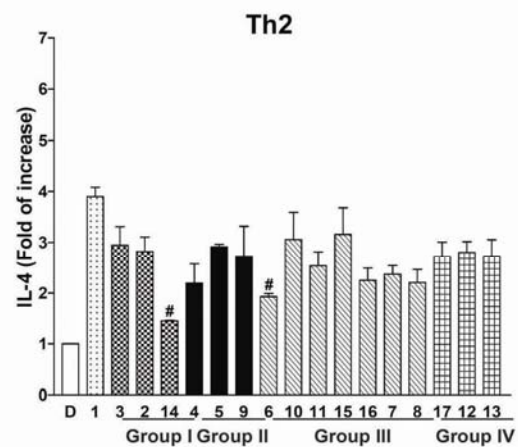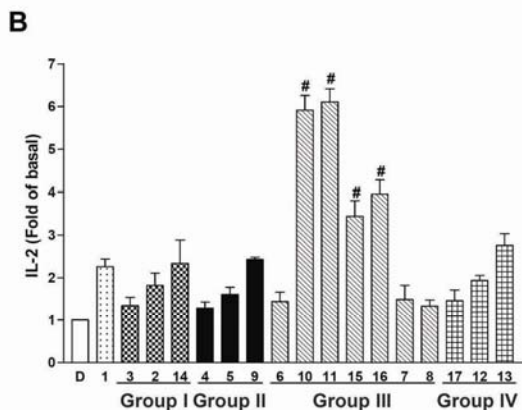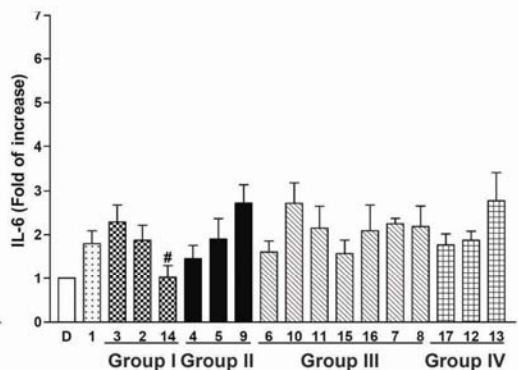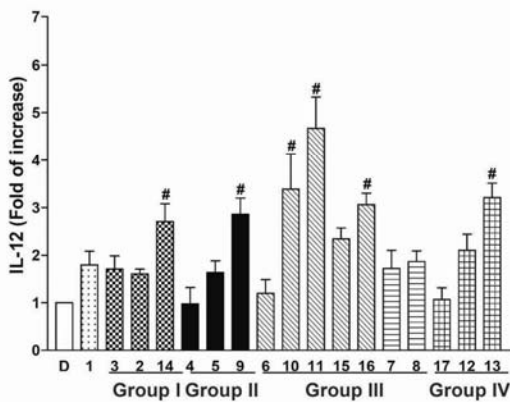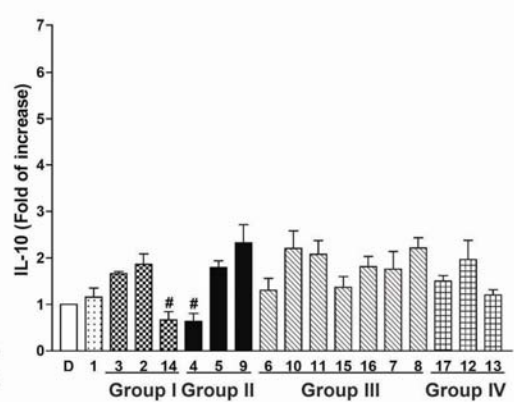

Supplement: pnas_0703824104_1.pdf [file pnas_0703824104_1.pdf]

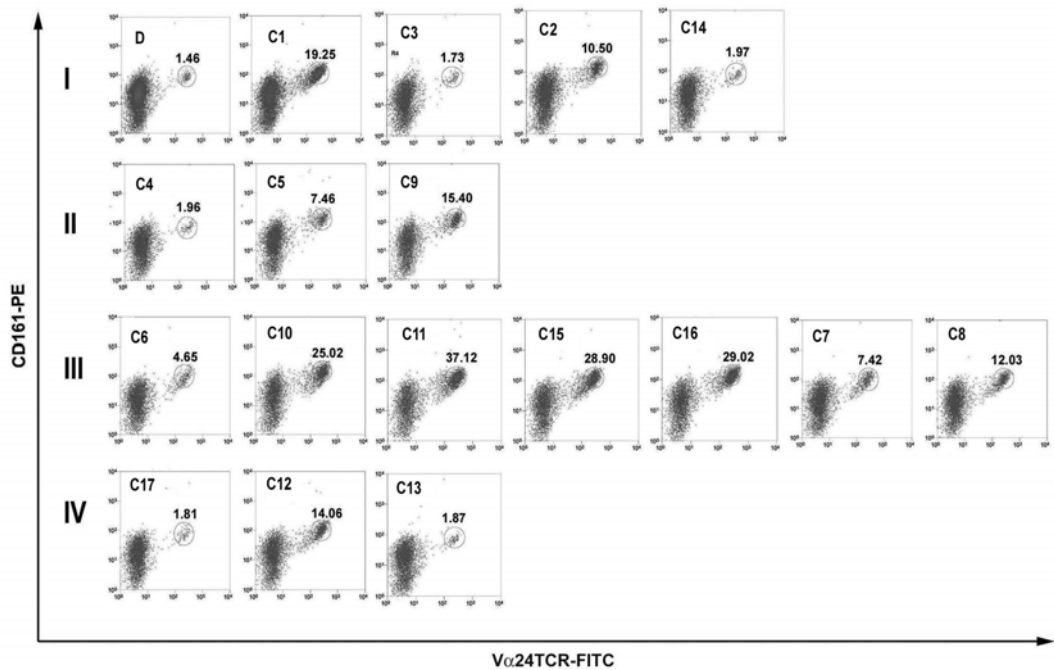

V $\alpha$ 24TCR-FITC

Supplement: pnas_0703824104_2.pdf [file pnas_0703824104_2.pdf]

**A**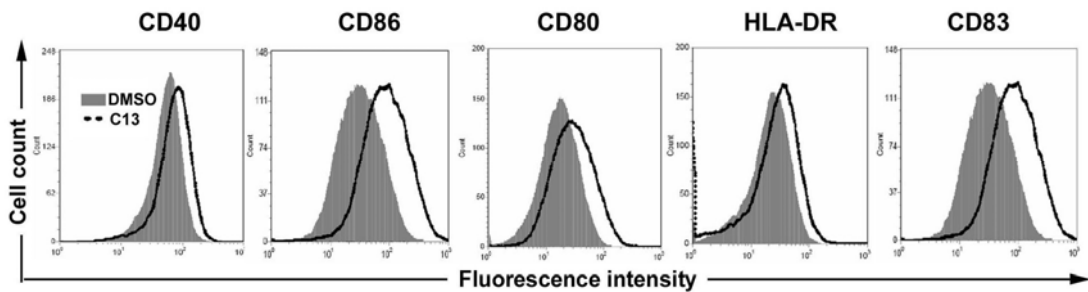**B**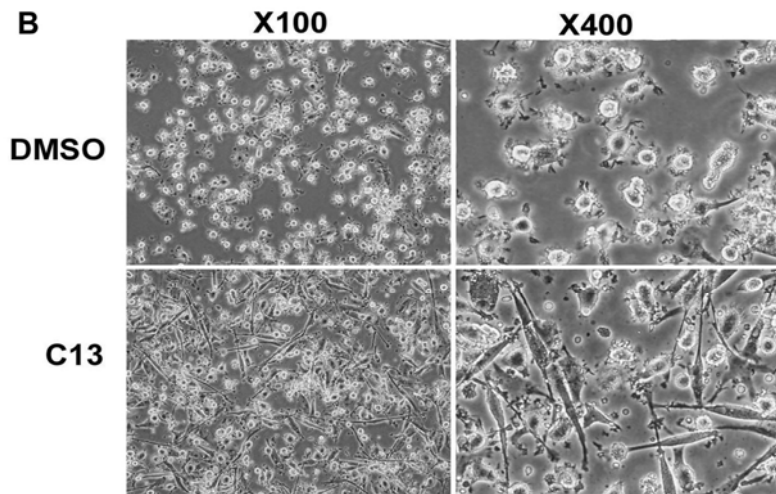

Supplement: pnas_0703824104_3.pdf [file pnas_0703824104_3.pdf]

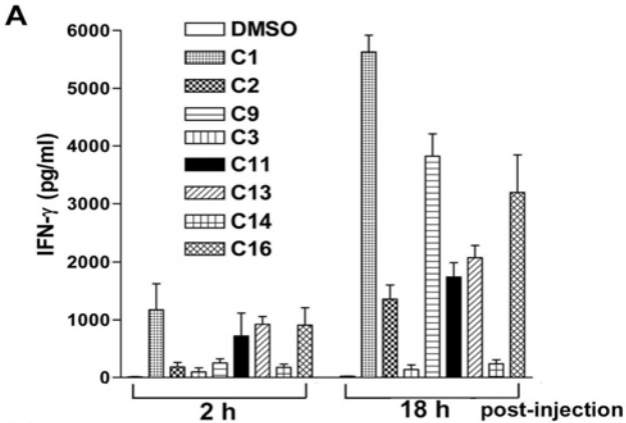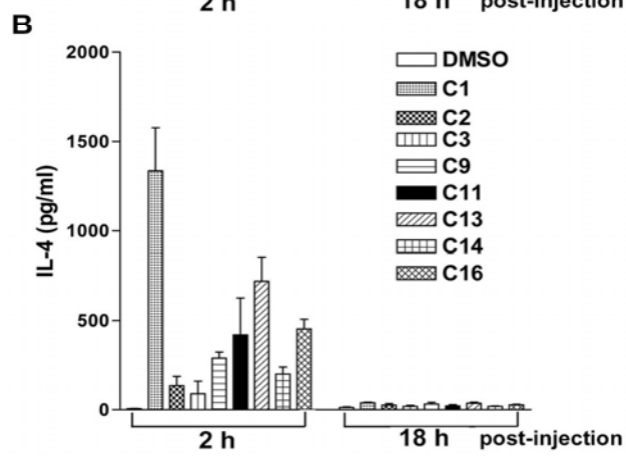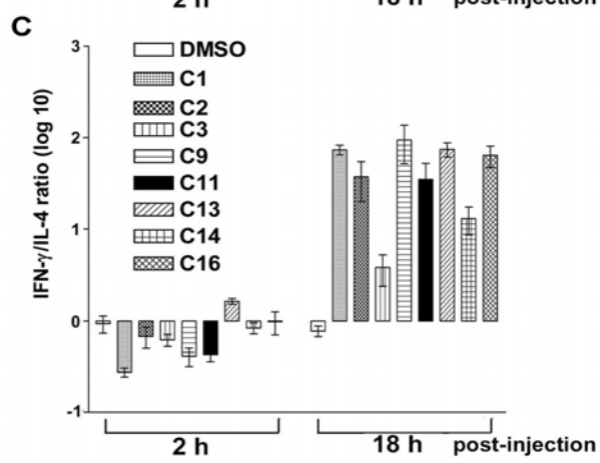

Supplement: pnas_0703824104_4.pdf [file pnas_0703824104_4.pdf]

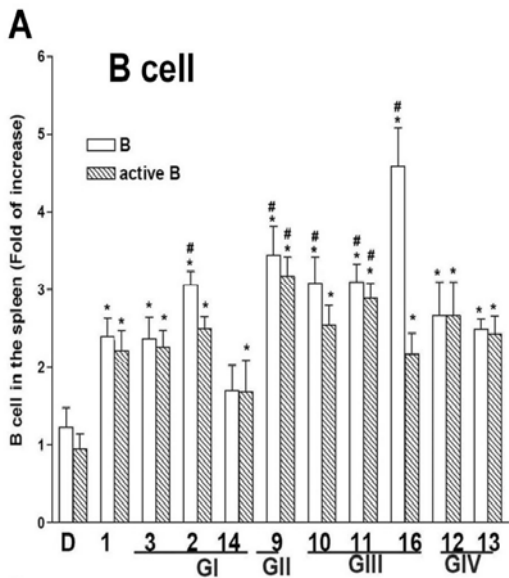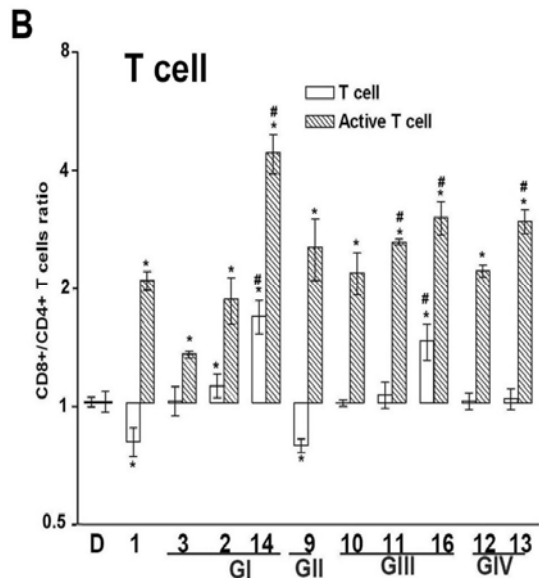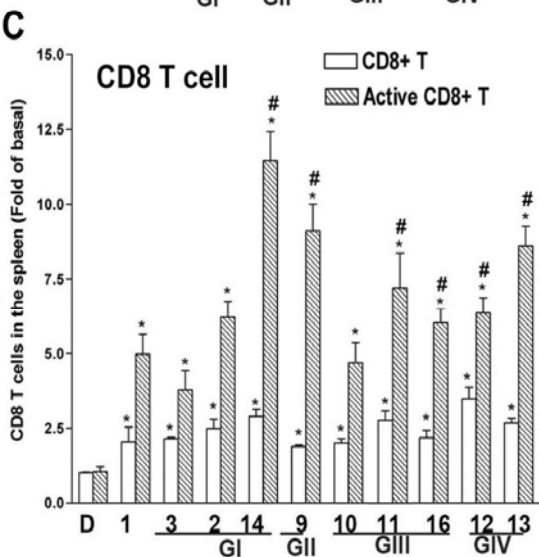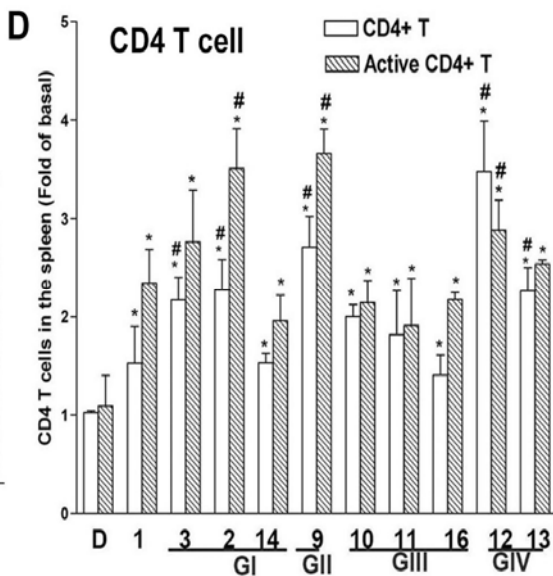

Supplement: pnas_0703824104_5.pdf [file pnas_0703824104_5.pdf]

**A**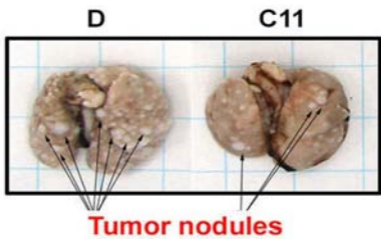**B**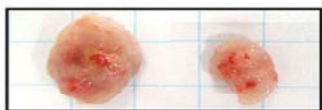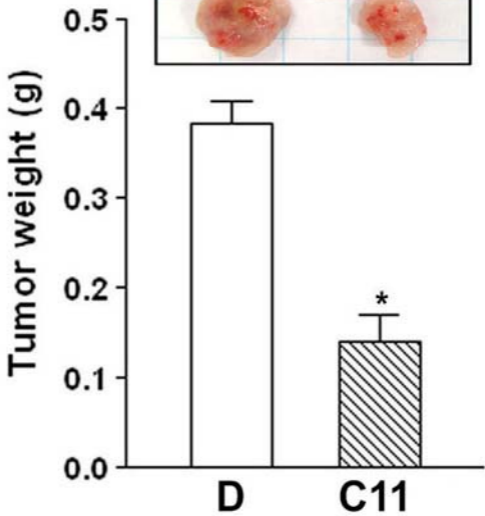

Supplement: pnas_0703824104_6.pdf [file pnas_0703824104_6.pdf]
